# Supplementary material
Source: PubMed Central journal article supplement (PMC3377341)
Supplement: emmm0002-0415-SD1.pdf [file emmm0002-0415-SD1.pdf]

## Supplement Figure 1

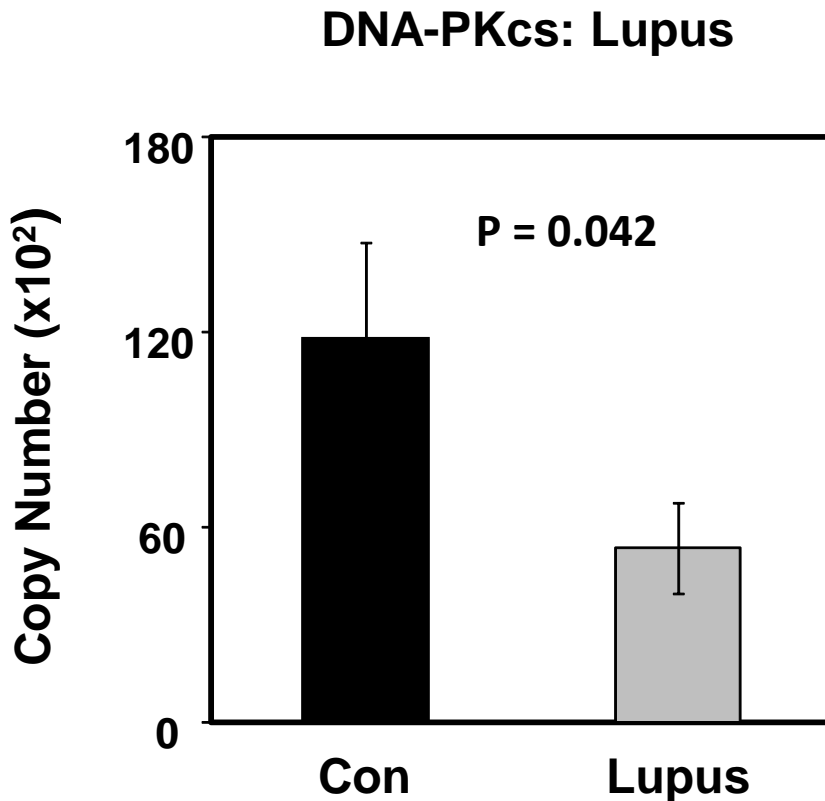

**Supplement Figure 1. DNA-PKcs expression is down regulated in SLE CD4 T cells.** CD4<sup>+</sup>CD45RO<sup>-</sup> T cells were purified from SLE patients and age-matched controls. Cells were analyzed immediately after isolation. **(B)** Transcript levels of DNA-PKcs from freshly isolated control (n=11) and SLE samples (n=13) were quantified by qPCR and standardized by 18S ribosomal RNA. Data are presented as mean  $\pm$  SEM.

**Supplement Table I. Demographic characteristics of SLE populations**

| Characteristics     | Controls    | SLE        |
|---------------------|-------------|------------|
| Number of subjects  | 11          | 13         |
| Female/Male         | 9/2         | 11/2       |
| Age (mean SD years) | 42.9 ± 15.1 | 40.1 ± 9.9 |
| Ethnicity           |             |            |
| African American    | 81.8 %      | 84.6 %     |
| White               | 18.2 %      | 15.4 %     |
